# Supplementary material for: Bromoenol Lactone Attenuates Nicotine-Induced Breast Cancer Cell Proliferation and Migration
Source: PLoS One. 2015 Nov 20;10(11):e0143277. doi: 10.1371/journal.pone.0143277 (PMC4654479; doi:10.1371/journal.pone.0143277)
Supplement: S1 Table — Observed experimental data analyzed in the results section and displayed in the manuscript’s figures. (XLSX) [file pone.0143277.s002.xlsx]

## Sheet: Sheet1
Figure 1A: Nicotine-induced cell proliferation (Cell Count analysis)
	24 Hours				48 Hours				72 Hours
Trials	Control	1uM Nicotine	5uM Nicotine	10uM Nicotine	Control	1uM Nicotine	5uM Nicotine	10uM Nicotine	Control	1uM Nicotine	5uM Nicotine	10uM Nicotine
1	7.67	11.5	9	9.25	9.8	12.7	13.5	16.9	46.89	51.89	62	86
2	3.6	4.75	5.6	5.5	8	11.6	10.4	14	33.2	41.25	39.2	52.3
3	5.75	5.5	4.5	7.25	8.3	13	14	12.2	34.8	38.75	42.5	67.33
4	2	1.3	2.5	4.25	8.25	8	9.2	12.7	9.78	33	34.5	38
Figure 1B: BEL attenuates nicotine-induced cell proliferation (MTT assay)
	Control	BEL	Nicotine	Nicotine + BEL
Trial 1	7.3	4.6	17.3	2.5
Trial 2	10	3.75	11.6	4.5
Trial 3	16.25	6.5	23.75	4
Trial 4	9.75	6.75	24.25	5.25
Trial 5	11	3.5	9.3	1.5
Trial 6	7.4	1.3
Trial 7	8	1.25
Figure 2B: Nicotine-induced cell migration is attenuated by BEL (Scratch assay)
	Control	10M Nic	10M Nic + BEL	BEL	CTRL	10M Nic	10M Nic + BEL	BEL
Trial 1	74.3	50	75.5	74.9	39.4	20	59.14	52.3
Trial 2	72	67.9	84.8	84.09	0.045	0.04	45	45.7
Trial 3	73.8	70	91.65	94.2	28.8	10.7	51.81	59
Trial 4	66.2	65.1	82.13	90	37	0.116	0.0007	82
Trial 5	77.9	61.8	83.4	79.4
Trial 6	83.2	58.15	86.39	84.3
Figure 2B: Nicotine-induced cell migration is attenuated by BEL (Transwell Assay)
	Control	BEL	Nicotine	Nicotine + BEL
Trial 1	10	4.6	17.3	2.5
Trial 2	7.3	3.75	11.6	4.5
Trial 3	16.25	6.5	23.75	4
Trial 4	9.75	6.75	24.25	5.25
Trial 5	11	3.5	9.3	1.5
Trial 6	7.4	1.3
Trial 7	8	1.25
Figure 3C: Nicotine-induced MMP-9 secretion is attenuate by BEL (Gel Zymography)
	Trial 1	Trial 2	Trial 3
Control	32.75	21.81	33.58
1μM Nicotine	38.18	38.88	37.08
5μM Nicotine	46.21	31.81	39.59
10μM Nicotine	46.33	43.52	40.39
BEL	35.53	34.92	28.66
1μM Nicotine + BEL	26.49	32.03	25.46
5μM Nicotine + BEL	20.51	32.5	21.87
10μM Nicotine + BEL	13.03	4.49	18.84
Figure 5A: Tumor Volume to Body Weight
Control	BEL	Nicotine	Nicotine + BEL
0.00116	0.00102	0.00119	0.00049
0.00298	0.0012	0.0065	0.00018
0.000745	0.00027	0.0026	0.00201
0.0023	7.8e-05	0.00616	0.00034
0.00088	0.00096	0.00214	0.000155
0.00063	0.00013	0.00265	0.00027
0.0035	0.000545	0.0123	0.0011
0.0013	8e-05	0.00557
0.00016
Figure 5B: Liver Weight to Body Weight
Control	BEL	Nicotine	Nicotine + BEL
0.064	0.051	0.071	0.056
0.056	0.055	0.055	0.057
0.0544	0.058	0.064	0.0821
0.0633	0.058	0.059	0.055
0.056	0.053	0.053	0.052
0.06	0.063	0.053	0.06
0.054	0.059	0.057	0.055
0.0522		0.0619
Figure 8B: Nicotine-induced lung tumor area µm2
Control	BEL	Nicotine	Nicotine + BEL
1400.83	0	8597.29	0
868.65	0	9472.54	0
397.99	0	6351.36	0
693.6	0	2814.02	0
394.69		1667.93
946.26		5649.5
873.6		4150.01
		19440.5
		7167.16
		1193.98
		4772.6
